# Supplementary material
Source: publisher figshare collection journal article supplement (https://karger.figshare.com/articles/dataset/_/5123395)
Supplement: Supplementary file 2 [file 1]

**Supplemental Table 1** Result of cDNA microarray: 84 upregulated genes in original MKN-7 cells in the presence or absence of co-culture with UE6E7T-12 BM-MSCs

| Gene ID   | Gene symbol | Gene title                                           | Folds   |
|-----------|-------------|------------------------------------------------------|---------|
| NM_000089 | COL1A2      | collagen, type I, alpha 2                            | 1773.01 |
| NM_000358 | TGFB1       | transforming growth factor, beta-induced,            | 223.26  |
| NM_004105 | EFEMP1      | EGF-containing fibulin-like extracellular matrix 1   | 166.6   |
| NM_003118 | SPARC       | secreted protein, acidic, cysteine-rich              | 160.87  |
| NM_002852 | PTX3        | pentraxin-related gene, rapidly induced by IL-1 beta | 137.26  |
| NM_000138 | FBN1        | fibrillin 1                                          | 132.55  |
| NM_212475 | FN1         | fibronectin 1                                        | 126.44  |
| NM_004369 | COL6A3      | collagen, type VI, alpha 3                           | 113.81  |
| NM_003380 | VIM         | vimentin                                             | 91.51   |
| NM_000090 | COL3A1      | collagen, type III, alpha 1                          | 84.29   |
| NM_000602 | SERPINE1    | serpin peptidase inhibitor, clade E, member 1        | 82.55   |
| NM_003289 | TPM2        | tropomyosin 2                                        | 82.30   |
| NM_000093 | COL5A1      | collagen, type V, alpha 1                            | 77.58   |
| NM_006317 | BASP1       | brain abundant, membrane attached signal protein 1   | 68.49   |
| NM_033138 | CALD1       | caldesmon 1                                          | 68.28   |
| NM_002192 | INHBA       | inhibin, beta A                                      | 63.44   |
| NM_003246 | THBS1       | thrombospondin 1                                     | 62.70   |
| NM_006475 | POSTN       | periostin, osteoblast specific factor                | 53.73   |
| NM_000088 | COL1A1      | collagen, type I, alpha 1                            | 53.42   |
| NM_000609 | CXCL12      | chemokine (C-X-C motif) ligand 12                    | 44.44   |
| NM_002317 | LOX         | lysyl oxidase                                        | 43.56   |
| NM_000362 | TIMP3       | TIMP metalloproteinase inhibitor 3                   | 42.92   |
| NM_007085 | FSTL1       | folliculin-like 1                                    | 41.98   |
| NM_001901 | CTGF        | connective tissue growth factor                      | 40.51   |
| NM_174556 | IGFBP3      | insulin-like growth factor binding protein 3         | 36.88   |
| NM_033664 | CDH11       | cadherin 11, type 2, OB-cadherin                     | 33.30   |
| NM_013352 | DSE         | dermatan sulfate epimerase                           | 31.67   |
| NM_015170 | SULF1       | sulfatase 1                                          | 30.72   |

|           |        |                                                    |       |
|-----------|--------|----------------------------------------------------|-------|
| NM_002727 | SRGN   | serglycin                                          | 29.67 |
| NM_004385 | VCAN   | versican                                           | 29.61 |
| NM_004181 | UCHL1  | ubiquitin carboxyl-terminal esterase L1            | 29.01 |
| NM_003247 | THBS2  | thrombospondin 2                                   | 28.44 |
| NM_002167 | ID3    | inhibitor of DNA binding 3                         | 27.04 |
| NM_012293 | PXDN   | peroxidasin homolog                                | 26.65 |
| NM_003186 | TAGLN  | transgelin                                         | 24.94 |
| NM_001627 | ALCAM  | activated leukocyte cell adhesion molecule         | 23.65 |
| NM_000165 | GJA1   | gap junction protein, alpha 1                      | 23.38 |
| NM_000393 | COL5A2 | collagen, type V, alpha 2                          | 20.38 |
| NM_021913 | AXL    | AXL receptor tyrosine kinase                       | 20.34 |
| NM_003068 | SNAI2  | snail homolog 2                                    | 20.09 |
| NM_005909 | MAP1B  | microtubule-associated protein 1B                  | 19.25 |
| NM_001613 | ACTA2  | actin, alpha 2, smooth muscle, aorta               | 17.39 |
| NM_002345 | LUM    | lumican                                            | 16.73 |
| NM_004598 | SPOCK1 | sparc/osteonectin, cwcv and kazal-like 1           | 16.59 |
| NM_013372 | GREM1  | gremlin 1, cysteine knot superfamily, homolog      | 16.54 |
| NM_000961 | PTGIS  | prostaglandin I2 synthase                          | 11.30 |
| NM_002998 | SDC2   | syndecan 2                                         | 9.24  |
| NM_002318 | ENTPD4 | ectonucleoside triphosphate diphosphohydrolase 4   | 9.07  |
| NM_006209 | ENPP2  | ectonucleotide pyrophosphatase/phosphodiesterase 2 | 8.68  |
| NM_133507 | DCN    | decorin                                            | 7.70  |
| NM_005613 | RGS4   | regulator of G-protein signaling 4                 | 7.66  |
| NM_006832 | FERMT2 | fermitin family homolog 2                          | 6.60  |
| NM_022648 | TNS1   | tensin 1                                           | 6.08  |
| NM_018847 | KLHL9  | kelch-like 9                                       | 5.87  |
| NM_005159 | ACTC1  | actin, alpha, cardiac muscle 1                     | 5.24  |
| NM_001848 | COL6A1 | collagen, type VI, alpha 1                         | 4.54  |
| NM_006039 | MRC2   | mannose receptor, C type 2                         | 4.49  |
| NM_003641 | IFITM1 | interferon induced transmembrane protein 1         | 4.44  |
| NM_016081 | PALLD  | palladin, cytoskeletal associated protein          | 4.41  |
| NM_006500 | MCAM   | melanoma cell adhesion molecule                    | 4.27  |

|              |          |                                                          |      |
|--------------|----------|----------------------------------------------------------|------|
| NM_006169    | NNMT     | nicotinamide N-methyltransferase                         | 4.20 |
| NM_032801    | JAM3     | junctional adhesion molecule 3                           | 4.15 |
| NM_032348    | MXRA8    | matrix-remodelling associated 8                          | 4.11 |
| NM_052966    | FAM129A  | family with sequence similarity 129, member A            | 4.03 |
| NM_004772    | C5orf13  | chromosome 5 open reading frame 13                       | 3.79 |
| NM_006868    | RAB31    | RAB31, member RAS oncogene family                        | 3.78 |
| NM_000877    | IL1R1    | interleukin 1 receptor, type I                           | 3.64 |
| NM_006009    | TUBA1A   | tubulin, alpha 1a                                        | 3.26 |
| NM_000428    | LTBP2    | latent transforming growth factor beta binding protein 2 | 3.18 |
| NM_003392    | WNT5A    | wingless-type MMTV integration site family, 5A           | 3.08 |
| NM_016441    | CRIM1    | cysteine rich transmembrane BMP regulator 1              | 3.07 |
| NM_021034    | IFITM3   | interferon induced transmembrane protein 3               | 2.95 |
| NM_001554    | CYR61    | cysteine-rich, angiogenic inducer, 61                    | 2.81 |
| NM_181690    | AKT3     | v-akt murine thymoma viral oncogene homolog 3            | 2.77 |
| NM_001711    | BGN      | biglycan                                                 | 2.64 |
| NM_005514    | HLA-B    | major histocompatibility complex, class I, B             | 2.64 |
| NM_002205    | ITGA5    | integrin, alpha 5                                        | 2.53 |
| NM_025190    | ANKRD36B | ankyrin repeat domain 36B                                | 2.50 |
| NM_019052    | CCHCR1   | coiled-coil alpha-helical rod protein 1                  | 2.49 |
| NM_006435    | IFITM2   | interferon induced transmembrane protein 2               | 2.46 |
| NM_003122    | SPINK1   | serine peptidase inhibitor, Kazal type 1                 | 2.44 |
| NM_006051    | APBB3    | amyloid beta precursor protein-binding, family B, 3      | 2.25 |
| NM_001161520 | COG5     | component of oligomeric golgi complex 5                  | 2.17 |
| NM_032109    | ARID5B   | AT rich interactive domain 5B                            | 2.15 |

---

**Supplemental Table 2** Result of cDNA microarray: 103 upregulated genes in CD133<sup>+</sup> MKN-7 cells in the presence or absence of co-culture with UE6E7T-12 BM-MSCs

| Gene ID   | Gene symbol | Gene title                                                 | Folds  |
|-----------|-------------|------------------------------------------------------------|--------|
| NM_000089 | COL1A2      | collagen, type I, alpha 2                                  | 550.74 |
| NM_003118 | SPARC       | secreted protein, acidic, cysteine-rich                    | 520.18 |
| NM_003289 | TPM2        | tropomyosin 2                                              | 359.88 |
| NM_006475 | POSTN       | periostin, osteoblast specific factor                      | 247.45 |
| NM_004369 | COL6A3      | collagen, type VI, alpha 3                                 | 244.19 |
| NM_002345 | LUM         | lumican                                                    | 202.95 |
| NM_033138 | CALD1       | caldesmon 1                                                | 182.67 |
| NM_000358 | TGFB1       | transforming growth factor, beta-induced                   | 178.15 |
| NM_000138 | FBN1        | fibrillin 1                                                | 157.64 |
| NM_000602 | SERPINE1    | serpin peptidase inhibitor, clade E, member 1              | 150.14 |
| NM_002167 | ID3         | inhibitor of DNA binding 3                                 | 92.01  |
| NM_000393 | COL5A2      | collagen, type V, alpha 2                                  | 87.54  |
| NM_000090 | COL3A1      | collagen, type III, alpha 1                                | 84.87  |
| NM_003186 | TAGLN       | transgelin                                                 | 73.68  |
| NM_015170 | SULF1       | sulfatase 1                                                | 69.16  |
| NM_007085 | FSTL1       | folliculin-like 1                                          | 67.51  |
| NM_003380 | VIM         | vimentin                                                   | 66.70  |
| NM_174556 | IGFBP3      | insulin-like growth factor binding protein 3               | 65.26  |
| NM_002317 | LOX         | lysyl oxidase                                              | 64.55  |
| NM_006097 | MYL9        | myosin, light chain 9, regulatory                          | 63.40  |
| NM_004105 | EFEMP1      | EGF-containing fibulin-like extracellular matrix protein 1 | 57.97  |
| NM_003246 | THBS1       | thrombospondin 1                                           | 54.32  |
| NM_000088 | COL1A1      | collagen, type I, alpha 1                                  | 53.17  |
| NM_002192 | INHBA       | inhibin, beta A                                            | 46.99  |
| NM_006988 | ADAMTS1     | ADAM metalloproteinase with thrombospondin 1 motif, 1      | 44.01  |
| NM_018847 | KLHL9       | kelch-like 9                                               | 42.84  |
| NM_013372 | GREM1       | gremlin 1, cysteine knot superfamily, homolog              | 40.27  |
| NM_212476 | FN1         | fibronectin 1                                              | 38.13  |

|           |        |                                                      |       |
|-----------|--------|------------------------------------------------------|-------|
| NM_002727 | SRGN   | serglycin                                            | 38.12 |
| NM_002852 | PTX3   | pentraxin-related gene, rapidly induced by IL-1 beta | 37.13 |
| NM_002998 | SDC2   | syndecan 2                                           | 35.03 |
| NM_001901 | CTGF   | connective tissue growth factor                      | 34.25 |
| NM_001792 | CDH2   | cadherin 2, type 1, N-cadherin                       | 32.07 |
| NM_000609 | CXCL12 | chemokine (C-X-C motif) ligand 12                    | 31.63 |
| NM_013352 | DSE    | dermatan sulfate epimerase                           | 28.39 |
| NM_033664 | CDH11  | cadherin 11, type 2, OB-cadherin                     | 27.22 |
| NM_006317 | BASP1  | brain abundant, membrane attached signal protein 1   | 23.99 |
| NM_005909 | MAP1B  | microtubule-associated protein 1B                    | 23.70 |
| NM_001613 | ACTA2  | actin, alpha 2, smooth muscle, aorta                 | 22.71 |
| NM_001627 | ALCAM  | activated leukocyte cell adhesion molecule           | 22.40 |
| NM_021913 | AXL    | AXL receptor tyrosine kinase                         | 21.90 |
| NM_000093 | COL5A1 | collagen, type V, alpha 1                            | 20.42 |
| NM_005159 | ACTC1  | actin, alpha, cardiac muscle 1                       | 19.34 |
| NM_000526 | KRT14  | keratin 14                                           | 18.93 |
| NM_006832 | FERMT2 | fermitin family homolog 2                            | 18.25 |
| NM_000362 | TIMP3  | TIMP metalloproteinase inhibitor 3                   | 18.05 |
| NM_006209 | ENPP2  | ectonucleotide pyrophosphatase/phosphodiesterase 2   | 17.78 |
| NM_000165 | GJA1   | gap junction protein, alpha 1                        | 17.65 |
| NM_004385 | VCAN   | versican                                             | 17.37 |
| NM_012293 | PXDN   | peroxidase homolog                                   | 17.22 |
| NM_022648 | TNS1   | tensin 1                                             | 16.30 |
| NM_003068 | SNAI2  | snail homolog 2                                      | 16.05 |
| NM_003247 | THBS2  | thrombospondin 2                                     | 15.93 |
| NM_005613 | RGS4   | regulator of G-protein signaling 4                   | 13.11 |
| NM_000961 | PTGIS  | prostaglandin I2 (prostacyclin) synthase             | 12.68 |
| NM_002318 | ENTPD4 | ectonucleoside triphosphate diphosphohydrolase 4     | 12.26 |
| NM_004598 | SPOCK1 | sparc/osteonectin, cwcv and kazal-like 1             | 10.61 |
| NM_015150 | RFTN1  | raftlin, lipid raft linker 1                         | 9.75  |
| NM_001711 | BGN    | biglycan                                             | 9.70  |
| NM_005576 | LOXL1  | lysyl oxidase-like 1                                 | 7.93  |

|              |         |                                                          |      |
|--------------|---------|----------------------------------------------------------|------|
| NM_005531    | IFI16   | interferon, gamma-inducible protein 16                   | 6.63 |
| NM_006009    | TUBA1A  | tubulin, alpha 1a                                        | 6.58 |
| NM_016441    | CRIM1   | cysteine rich transmembrane BMP regulator 1              | 6.52 |
| NM_001554    | CYR61   | cysteine-rich, angiogenic inducer, 61                    | 5.93 |
| NM_006288    | THY1    | Thy-1 cell surface antigen                               | 5.72 |
| NM_001449    | FHL1    | four and a half LIM domains 1                            | 5.68 |
| NM_016081    | PALLD   | palladin, cytoskeletal associated protein                | 4.90 |
| NM_001321    | CSRP2   | cysteine and glycine-rich protein 2                      | 4.58 |
| NM_006039    | MRC2    | mannose receptor, C type 2                               | 4.47 |
| NM_001458    | FLNC    | filamin C, gamma                                         | 4.36 |
| NM_133507    | DCN     | decorin                                                  | 4.31 |
| NM_024563    | C5orf23 | chromosome 5 open reading frame 23                       | 4.14 |
| NM_002444    | MSN     | moesin                                                   | 4.11 |
| NM_000428    | LTBP2   | latent transforming growth factor beta binding protein 2 | 4.10 |
| NM_002305    | LGALS1  | lectin, galactoside-binding, soluble, 1                  | 4.04 |
| NM_003097    | SNRPN   | small nuclear ribonucleoprotein polypeptide N            | 3.96 |
| NM_181690    | AKT3    | v-akt murine thymoma viral oncogene homolog 3            | 3.85 |
| NM_003392    | WNT5A   | wingless-type MMTV integration site family, 5A           | 3.78 |
| NM_014840    | NUAK1   | NUAK family, SNF1-like kinase, 1                         | 3.60 |
| NM_013409    | FST     | follistatin                                              | 3.33 |
| NM_032348    | MXRA8   | matrix-remodelling associated 8                          | 3.30 |
| NM_004772    | C5orf13 | chromosome 5 open reading frame 13                       | 3.21 |
| NM_018431    | DOK5    | docking protein 5                                        | 3.12 |
| NM_001018004 | TPM1    | tropomyosin 1                                            | 3.05 |
| NM_005952    | MT1X    | metallothionein 1X                                       | 2.80 |
| NM_005953    | MT2A    | metallothionein 2A                                       | 2.78 |
| NM_006868    | RAB31   | RAB31, member RAS oncogene family                        | 2.74 |
| NM_003676    | DEGS1   | degenerative spermatocyte homolog 1, lipid desaturase    | 2.67 |
| NM_001262    | CDKN2C  | cyclin-dependent kinase inhibitor 2C                     | 2.58 |
| NM_000820    | GAS6    | growth arrest-specific 6 /                               | 2.57 |
| NM_000584    | IL8     | interleukin 8                                            | 2.49 |
| NM_003709    | KLF7    | Kruppel-like factor 7                                    | 2.44 |

|              |         |                                                    |      |
|--------------|---------|----------------------------------------------------|------|
| NM_021630    | PDLIM2  | PDZ and LIM domain 2                               | 2.34 |
| NM_133494    | NEK7    | NIMA (never in mitosis gene a)-related kinase 7    | 2.32 |
| NM_001848    | COL6A1  | collagen, type VI, alpha 1                         | 2.30 |
| NM_001015880 | PAPSS2  | 3'-phosphoadenosine 5'-phosphosulfate synthase 2   | 2.30 |
| NM_000232    | SGCB    | sarcoglycan, beta                                  | 2.30 |
| NM_015675    | GADD45B | growth arrest and DNA-damage-inducible, beta       | 2.26 |
| NM_001845    | COL4A1  | collagen, type IV, alpha 1                         | 2.25 |
| NM_177424    | STX12   | syntaxin 12                                        | 2.21 |
| NM_007315    | STAT1   | signal transducer and activator of transcription 1 | 2.19 |
| NM_005168    | RND3    | Rho family GTPase 3                                | 2.19 |
| NM_005627    | SGK1    | serum/glucocorticoid regulated kinase 1            | 2.19 |

---

**Supplemental Table 3** Result of cDNA microarray: 106 upregulated genes in CD133<sup>-</sup> MKN-7 cells in the presence or absence of co-culture with UE6E7T-12 BM-MSCs

| Gene ID   | Gene symbol | Gene title                                            | Folds  |
|-----------|-------------|-------------------------------------------------------|--------|
| NM_003118 | SPARC       | secreted protein, acidic, cysteine-rich               | 717.99 |
| NM_000089 | COL1A2      | collagen, type I, alpha 2                             | 707.13 |
| NM_002345 | LUM         | lumican                                               | 248.19 |
| NM_000358 | TGFBI       | transforming growth factor, beta-induced              | 235.32 |
| NM_003246 | THBS1       | thrombospondin 1                                      | 226.97 |
| NM_000138 | FBN1        | fibrillin 1                                           | 126.69 |
| NM_000602 | SERPINE1    | serpin peptidase inhibitor, clade E, member 1         | 124.63 |
| NM_012293 | PXDN        | peroxidasin homolog                                   | 111.59 |
| NM_033138 | CALD1       | caldesmon 1                                           | 102.78 |
| NM_004369 | COL6A3      | collagen, type VI, alpha 3                            | 93.78  |
| NM_002317 | LOX         | lysyl oxidase                                         | 93.64  |
| NM_002998 | SDC2        | syndecan 2                                            | 83.90  |
| NM_003289 | TPM2        | tropomyosin 2                                         | 76.49  |
| NM_006475 | POSTN       | periostin, osteoblast specific factor                 | 74.20  |
| NM_000090 | COL3A1      | collagen, type III, alpha 1                           | 71.94  |
| NM_001627 | ALCAM       | activated leukocyte cell adhesion molecule            | 65.29  |
| NM_003380 | VIM         | vimentin                                              | 61.43  |
| NM_007805 | FSTL1       | folliculin-like 1                                     | 60.61  |
| NM_002192 | INHBA       | inhibin, beta A                                       | 58.32  |
| NM_015170 | SULF1       | sulfatase 1                                           | 57.37  |
| NM_000393 | COL5A2      | collagen, type V, alpha 2                             | 54.20  |
| NM_006988 | ADAMTS1     | ADAM metalloproteinase with thrombospondin 1 motif, 1 | 52.95  |
| NM_004105 | EFEMP1      | EGF-containing fibulin-like extracellular matrix 1    | 50.88  |
| NM_003408 | MFAP5       | microfibrillar associated protein 5                   | 50.29  |
| NM_000526 | KRT14       | keratin 14                                            | 49.67  |
| NM_001901 | CTGF        | connective tissue growth factor                       | 48.59  |
| NM_000609 | CXCL12      | chemokine (C-X-C motif) ligand 12                     | 41.34  |
| NM_000088 | COL1A1      | collagen, type I, alpha 1                             | 40.49  |



|           |        |                                                      |       |
|-----------|--------|------------------------------------------------------|-------|
| NM_033664 | CDH11  | cadherin 11, type 2, OB-cadherin                     | 38.44 |
| NM_212476 | FN1    | fibronectin 1                                        | 36.18 |
| NM_003186 | TAGLN  | transgelin                                           | 35.43 |
| NM_174556 | IGFBP3 | insulin-like growth factor binding protein 3         | 33.81 |
| NM_000165 | GJA1   | gap junction protein, alpha 1                        | 32.67 |
| NM_004835 | VCAN   | versican                                             | 31.39 |
| NM_002727 | SRGN   | serglycin                                            | 29.67 |
| NM_002852 | PTX3   | pentraxin-related gene, rapidly induced by IL-1 beta | 26.78 |
| NM_002167 | ID3    | inhibitor of DNA binding 3                           | 23.77 |
| NM_003068 | SNAI2  | snail homolog 2                                      | 22.36 |
| NM_005613 | RGS4   | regulator of G-protein signaling 4                   | 21.89 |
| NM_000093 | COL5A1 | collagen, type V, alpha 1                            | 20.38 |
| NM_000362 | TIMP3  | TIMP metalloproteinase inhibitor 3                   | 19.46 |
| NM_001613 | ACTA2  | actin, alpha 2, smooth muscle, aorta                 | 16.81 |
| NM_004598 | SPOCK1 | sparc/osteonectin, cwcv and kazal-like 1             | 16.44 |
| NM_006317 | BASP1  | brain abundant, membrane attached signal protein 1   | 16.41 |
| NM_005909 | MAP1B  | microtubule-associated protein 1B                    | 15.24 |
| NM_013372 | GREM1  | gremlin 1, cysteine knot superfamily, homolog        | 15.18 |
| NM_031442 | TMEM47 | transmembrane protein 47                             | 14.61 |
| NM_005159 | ACTC1  | actin, alpha, cardiac muscle 1                       | 12.54 |
| NM_006832 | FERMT2 | fermitin family homolog 2                            | 11.72 |
| NM_018847 | KLHL9  | kelch-like 9                                         | 10.63 |
| NM_003247 | THBS2  | thrombospondin 2                                     | 10.06 |
| NM_013352 | DSE    | dermatan sulfate epimerase                           | 8.76  |
| NM_002318 | ENTPD4 | ectonucleoside triphosphate diphosphohydrolase 4     | 8.42  |
| NM_021913 | AXL    | AXL receptor tyrosine kinase                         | 8.16  |
| NM_022648 | TNS1   | tensin 1                                             | 7.85  |
| NM_000961 | PTGIS  | prostaglandin I2 (prostacyclin) synthase             | 7.45  |
| NM_006009 | TUBA1A | tubulin, alpha 1a                                    | 6.15  |
| NM_001554 | CYR61  | cysteine-rich, angiogenic inducer, 61                | 5.58  |
| NM_016081 | PALLD  | palladin, cytoskeletal associated protein            | 4.85  |
| NM_013409 | FST    | folistatin                                           | 4.70  |

|              |         |                                                          |      |
|--------------|---------|----------------------------------------------------------|------|
| NM_133507    | DCN     | decorin                                                  | 4.25 |
| NM_001458    | FLNC    | filamin C, gamma                                         | 4.14 |
| NM_003392    | WNT5A   | wingless-type MMTV integration site family, 5A           | 4.01 |
| NM_001262    | CDKN2C  | cyclin-dependent kinase inhibitor 2C                     | 3.77 |
| NM_181690    | AKT3    | v-akt murine thymoma viral oncogene homolog 3            | 3.66 |
| NM_006039    | MRC2    | mannose receptor, C type 2                               | 3.63 |
| NM_001018004 | TPM1    | tropomyosin 1                                            | 3.60 |
| NM_003097    | SNRPN   | small nuclear ribonucleoprotein polypeptide N            | 3.53 |
| NM_001015880 | PAPSS2  | 3'-phosphoadenosine 5'-phosphosulfate synthase 2         | 3.39 |
| NM_001791    | CDC42   | cell division cycle 42                                   | 3.08 |
| NM_032348    | MXRA8   | matrix-remodelling associated 8                          | 3.04 |
| NM_014840    | NUAK1   | NUAK family, SNF1-like kinase, 1                         | 3.04 |
| NM_001449    | FHL1    | four and a half LIM domains 1                            | 2.96 |
| NM_006868    | RAB31   | RAB31, member RAS oncogene family                        | 2.88 |
| NM_001321    | CSRP2   | cysteine and glycine-rich protein 2                      | 2.87 |
| NM_001015    | RPS11   | Ribosomal protein S11                                    | 2.85 |
| NM_016019    | LUC7L2  | LUC7-like 2                                              | 2.70 |
| NM_004772    | C5orf13 | chromosome 5 open reading frame 13                       | 2.69 |
| NM_004472    | FOXD1   | forkhead box D1                                          | 2.67 |
| NM_016441    | CRIM1   | cysteine rich transmembrane BMP regulator 1              | 2.62 |
| NM_002037    | FYN     | FYN oncogene related to SRC, FGR, YES                    | 2.59 |
| NM_001848    | COL6A1  | collagen, type VI, alpha 1                               | 2.54 |
| NM_000428    | LTBP2   | latent transforming growth factor beta binding protein 2 | 2.50 |
| NM_002006    | FGF2    | fibroblast growth factor 2                               | 2.49 |
| NM_133494    | NEK7    | NIMA (never in mitosis gene a)-related kinase 7          | 2.48 |
| NM_032801    | JAM3    | junctional adhesion molecule 3                           | 2.47 |
| NM_005627    | SGK1    | serum/glucocorticoid regulated kinase 1                  | 2.46 |
| NM_002718    | PPP2R3A | protein phosphatase 2, regulatory subunit B", alpha      | 2.42 |
| NM_006290    | TNFAIP3 | tumor necrosis factor, alpha-induced protein 3           | 2.39 |
| NM_015148    | PASK    | PAS domain containing serine/threonine kinase            | 2.39 |
| NM_007166    | PICALM  | phosphatidylinositol binding clathrin assembly protein   | 2.36 |
| NM_006369    | LRRC41  | leucine rich repeat containing 41                        | 2.36 |

|           |        |                                                             |      |
|-----------|--------|-------------------------------------------------------------|------|
| NM_000232 | SGCB   | sarcoglycan, beta                                           | 2.34 |
| NM_004094 | EIF2S1 | eukaryotic translation initiation factor 2, subunit 1 alpha | 2.29 |
| NM_005953 | MT2A   | metallothionein 2A                                          | 2.29 |
| NM_024324 | CRELD2 | cysteine-rich with EGF-like domains 2                       | 2.27 |
| NM_205768 | ZNF238 | zinc finger protein 238                                     | 2.26 |
| NM_001427 | EN2    | engrailed homeobox 2                                        | 2.25 |
| NM_000963 | PTGS2  | prostaglandin-endoperoxide synthase 2                       | 2.22 |
| NM_016332 | SEPX1  | selenoprotein X, 1                                          | 2.21 |
| NM_005730 | CTDSP2 | CTD (carboxy-terminal domain) small phosphatase 2           | 2.17 |
| NM_013316 | CNOT4  | CCR4-NOT transcription complex, subunit 4                   | 2.17 |
| NM_024408 | NOTCH2 | Notch homolog 2                                             | 2.11 |
| NM_007315 | STAT1  | signal transducer and activator of transcription 1          | 2.11 |
| NM_001706 | BCL6   | B-cell CLL/lymphoma 6                                       | 2.10 |
| NM_014363 | SACS   | spastic ataxia of Charlevoix-Saguenay (sacsin)              | 2.01 |

---
